# Supplementary material for: Co-Targeting PIM Kinase and PI3K/mTOR in NSCLC
Source: MDPI journal article supplement (doi:10.3390/cancers13092139), 2021-04-29
Supplement: s1 [file s1]

# Supplementary Materials: Co-Targeting PIM Kinase and PI3K/mTOR in NSCLC

Gillian Moore, Clara Lightner, Samira Elbai, Lauren Brady, Siobhan Nicholson, Ronan Ryan, Katie E. O'Sullivan, Kenneth J. O'Byrne, Carmen Blanco-Apiricio, Sinead Cuffe, Michael O'Neill, Susan Heavey, Stephen P. Finn and Kathy Gately

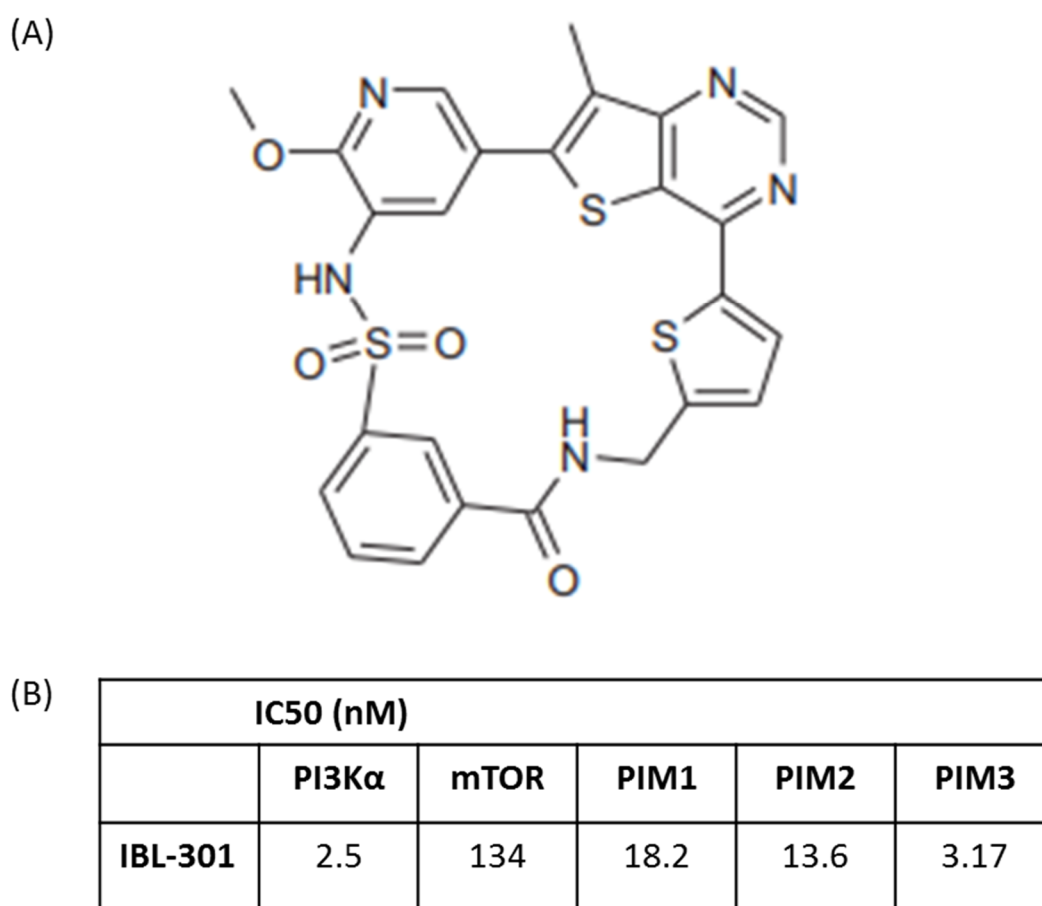

**Figure S1.** (A) The precise synthetic structure of triple PI3K, mTOR and PIM1/2/3 kinase inhibitor IBL-301 and (B) IC<sub>50</sub> of 2.5, 134, 18.2, 13.6 and 3.17 nM respectively.

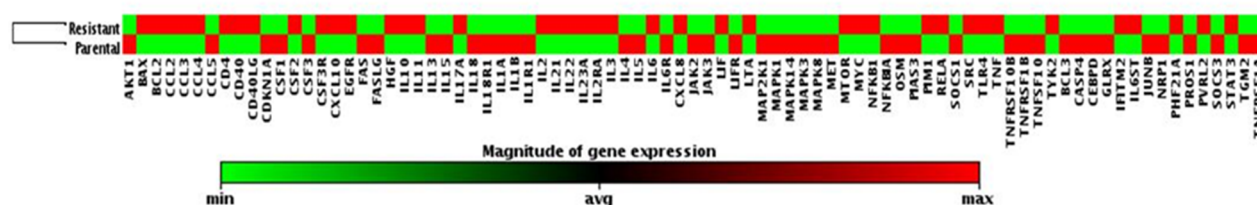

**Figure S2.** IL-6/STAT3 gene array expression profile of GDC-0980 resistant H1975 (H1975GR) versus parent H1975 (H1975P). A clustergram of the 84-gene array provides a heat map of gene clusters differentially co-regulated between H1975GP and H1975GR.

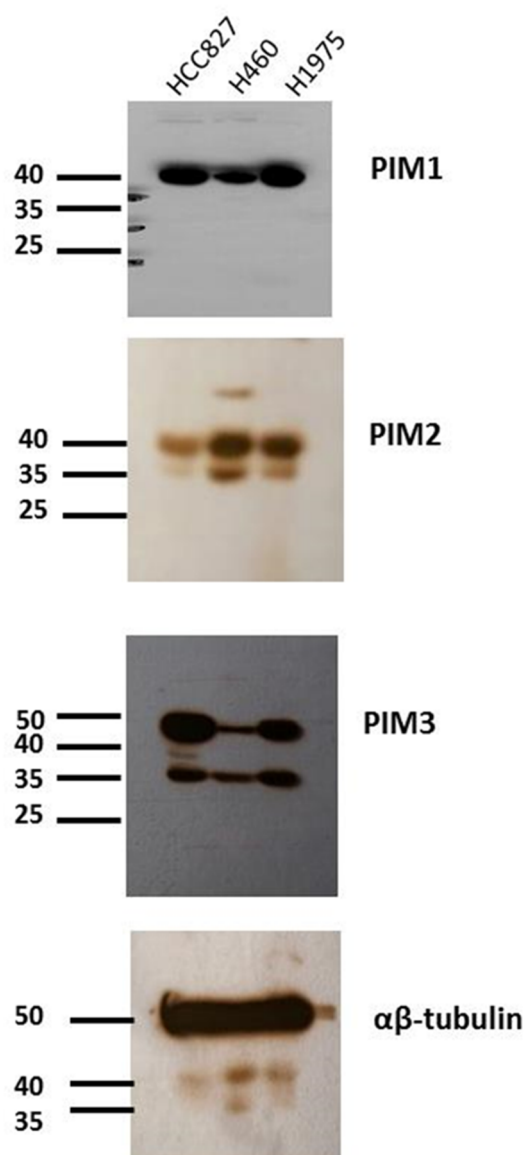

**Figure S3.** Original Western blots for Figure 1A.

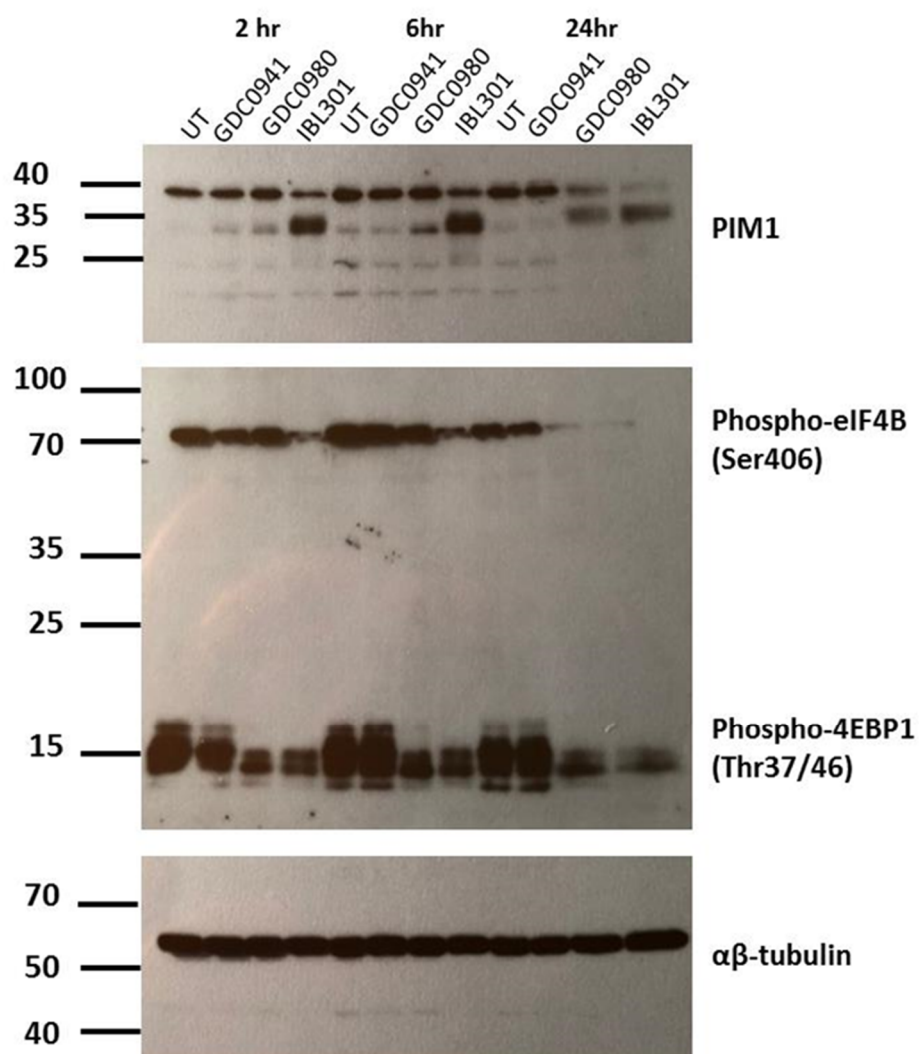

Figure S4. Original Western blots for Figure 3B.

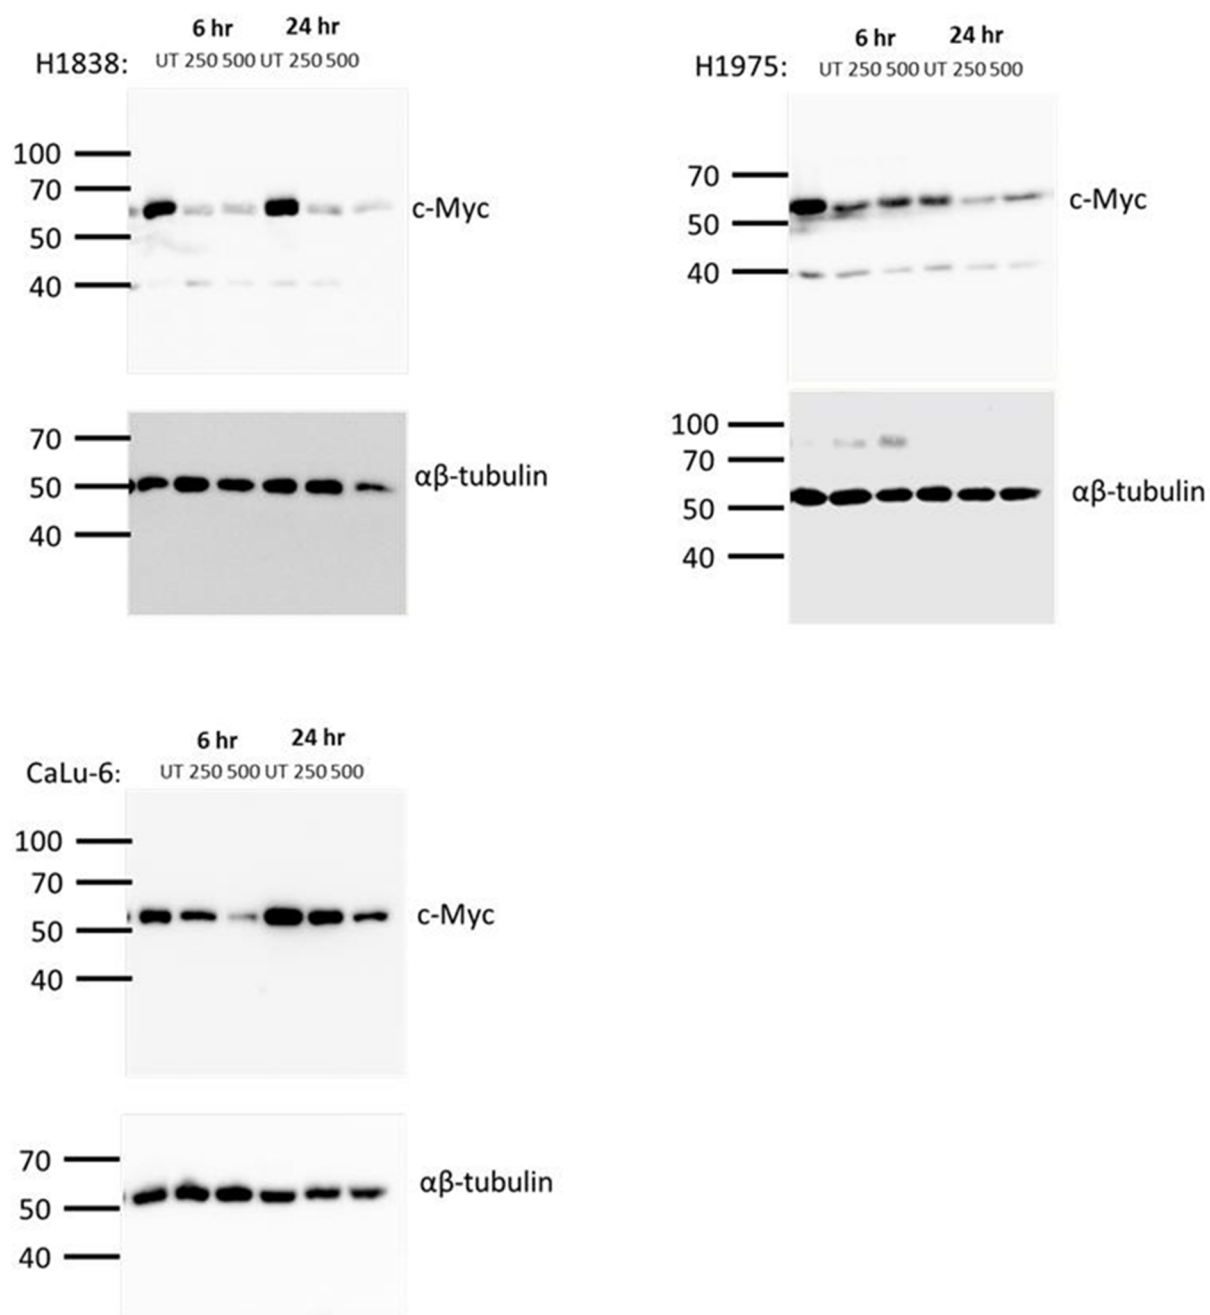

Figure S5. Original Western blots for Figure 3C.

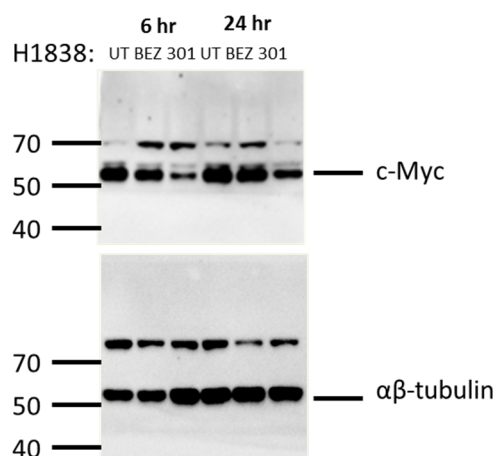

**Figure S6.** Original Western blots for Figure 3D.

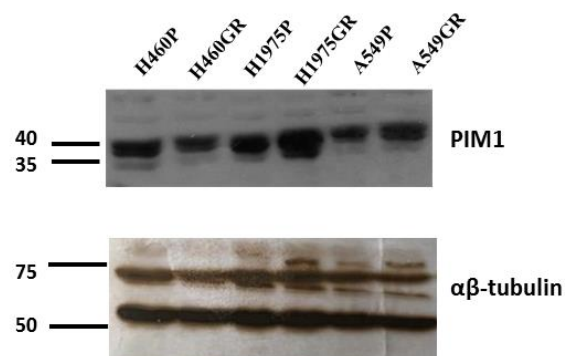

**Figure S7.** Original Western blots for Figure 5A.

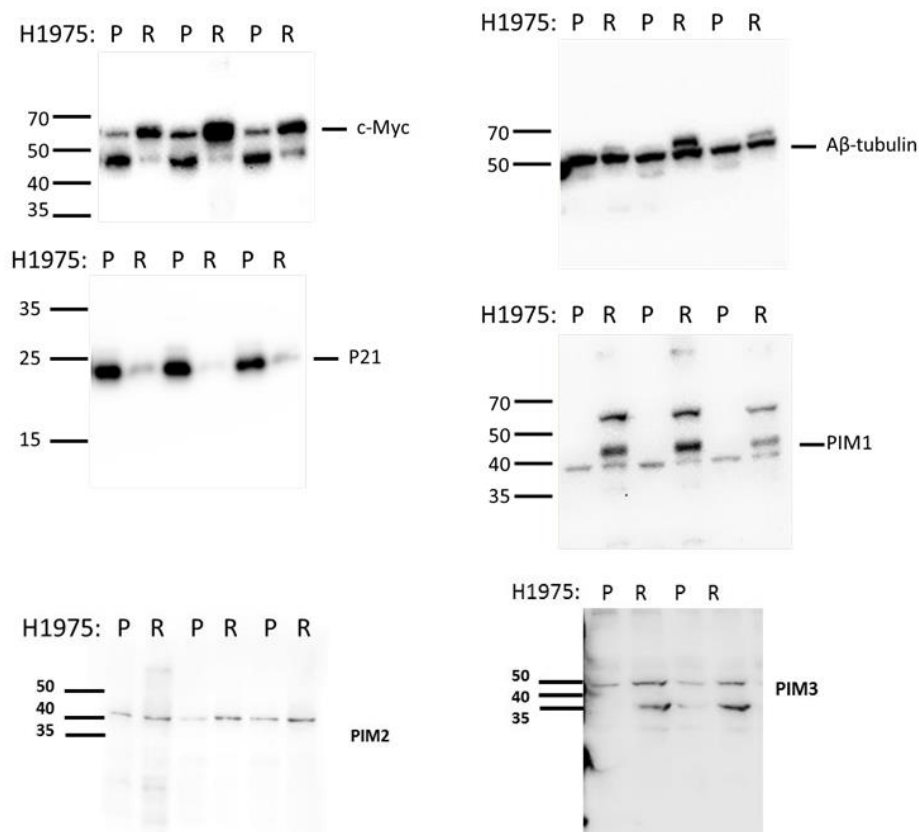

Figure S8. Original Western blots for Figure 6A.

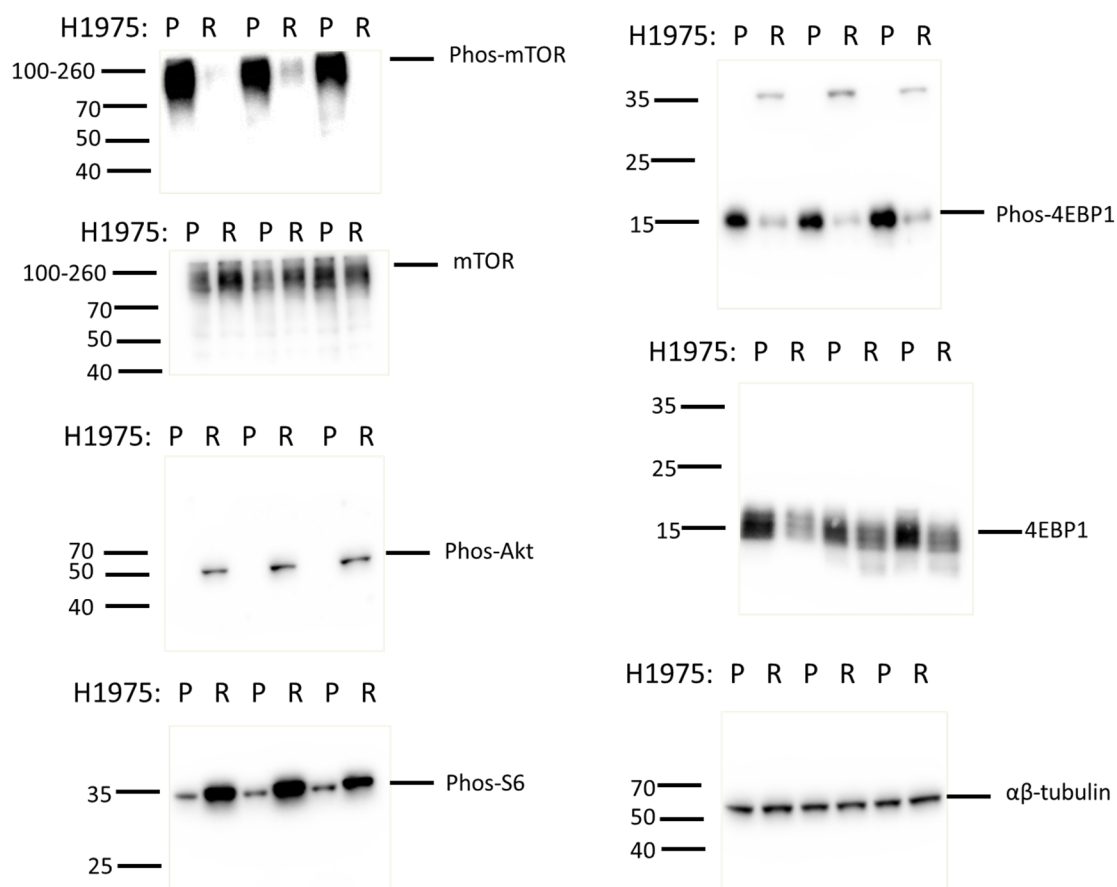

Figure S9. Original Western blots for Figure 6B.

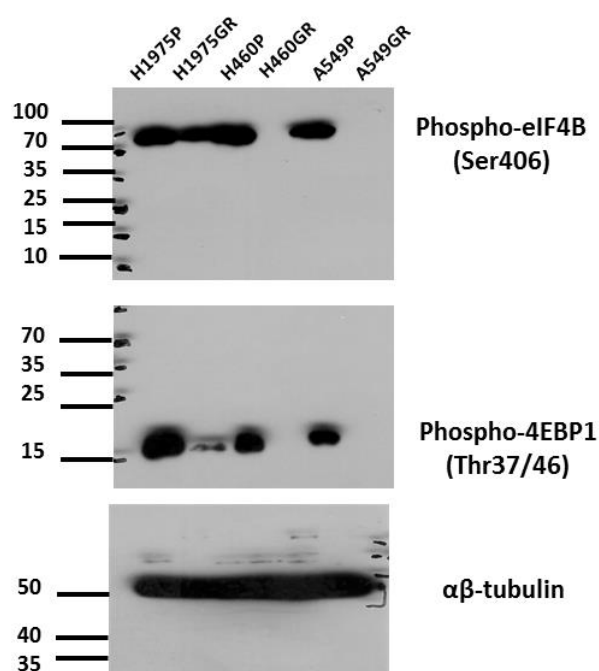

**Figure S10.** Original Western blots for Figure 6C.

**Table S1.** NSCLC Patient Clinicopathological Characteristics.

|                                                     |                    |
|-----------------------------------------------------|--------------------|
| <b>Age (mean <math>\pm</math> S.D.)</b>             | 64 ( $\pm$ 9.1)    |
| <b>Sex (%):</b>                                     |                    |
| Male                                                | 85 (63.4%)         |
| Female                                              | 49 (36.6%)         |
| <b>Smoking Status (%)</b>                           |                    |
| Current                                             | 65 (48.5%)         |
| Ex-Smoker                                           | 47 (35.1%)         |
| Non-Smoker                                          | 22 (16.4%)         |
| <b>Histology (%)</b>                                |                    |
| Adenocarcinoma                                      | 60 (44.8%)         |
| Squamous Cell Carcinoma                             | 65 (48.5%)         |
| Other                                               | 9 (6.7%)           |
| <b>Grade (%)</b>                                    |                    |
| 1                                                   | 12 (9.0%)          |
| 2                                                   | 80 (59.7%)         |
| 3                                                   | 42 (31.3%)         |
| <b>Tumor size (cm) (mean <math>\pm</math> S.D.)</b> | 4.87 ( $\pm$ 2.61) |
| <b>T-stage (%)</b>                                  |                    |
| IA-IB                                               | 71 (53.0%)         |
| IIA-IIIB                                            | 35 (26.1%)         |
| IIIA-IIIB                                           | 27 (20.2%)         |
| IV                                                  | 1 (0.7%)           |

| Nodal Involvement (%) |            |
|-----------------------|------------|
| Yes                   | 54 (40.3%) |
| No                    | 80 (59.7%) |

**Table S2.** Patient characteristics for ex-plant tumor tissues treated with BEZ235 or IBL-301.

| Histology      | Age | Gender | Stage | Sample Type Tested |
|----------------|-----|--------|-------|--------------------|
| Adenocarcinoma | 73  | Male   | IIIA  | Tissue & TCM       |
| Adenocarcinoma | 67  | Male   | IIIA  | Tissue & TCM       |
| Squamous Cell  | 66  | Male   | IIIA  | Tissue & TCM       |
| Squamous Cell  | 76  | Female | IA    | TCM                |
| Adenocarcinoma | 71  | Male   | IIIA  | TCM                |
| Adenocarcinoma | 78  | Female | IB    | TCM                |
| Squamous Cell  | 71  | Female | IIIA  | TCM                |
| Adenocarcinoma | 70  | Male   | IIIA  | TCM                |
| Adenocarcinoma | 77  | Female | IIIA  | TCM                |

Resected lung tumor samples were dissected, cultured and treated with DMSO vehicle control (UT), 250nM BEZ235 or 250nM IBL-301. After 72 hr treatment tissue and tissue culture media (TCM) were stored at -80°C. Patient histology, age, gender and tumor staging AJCC (7th Ed) are summarized in the Table.

**Table S3.** Forward and Reverse Primer Sequences used for mRNA expression validations by qPCR.

| Gene Name | Primer Sequence:             |
|-----------|------------------------------|
| MYC       | FW: CTTCTCTGAAAGGCTCTCCTTG   |
|           | REV: GTCGAGGTCATAGTTCCTGTTG  |
| PIM1      | FW: GAAACAGGTTGGGATGGGATAG   |
|           | REV: CACAGAAGGCACTCAGAAAGA   |
| MTOR      | FW: GGTCGTGGAGAACATGGATTAG   |
|           | REV: ACCAGTGAGGTCTTGGGATA    |
| SOCS1     | FW: CTTCTGTAGGATGGTAGCACAC   |
|           | REV: AGAACCTTCCTCCTCTTCCT    |
| CDKN1A1   | FW: CGGAACAAGGAGTCAGACATT    |
|           | REV: AGTGCCAGGAAAGACAACACTAC |
| BCL2      | FW: GGCCAGGGTCAGAGTTAAATAG   |
|           | REV: GGAGGTTCTCAGATGTTCTTCTC |
| TNF       | FW: GATCCCTGACATCTGGAATCTG   |
|           | REV: GAAACATCTGGAGAGAGGAAGG  |
| CD40      | FW: CATCCAGTCTCCCAACTTGTAT   |
|           | REV: CGGAAGGTCTGGTGGATATTAC  |
| B2M       | FW: CCAGCGTACTCCAAAGATTCA    |
|           | REV: TGGATGAAACCCAGACACATAG  |
| RPLP0     | FW: ATGTTGCCAGTGTCTGTCTG     |
|           | REV: AGCAAGTGGGAAGGTGTAATC   |

**Table S4.** Name of miRNAs included in array panel and their corresponding Exiqon probe catalogue names.

| miR Name       | Exiqon Probe Name: |
|----------------|--------------------|
| hsa-miR-17-5p  | 204771             |
| hsa-miR-20a-5p | 204292             |
| hsa-miR-20b-5p | 204755             |
| hsa-miR-18a-5p | 204207             |
| hsa-miR-19a-3p | 205862             |



|                 |        |
|-----------------|--------|
| hsa-miR-19b-3p  | 204450 |
| hsa-miR-18b-5p  | 204084 |
| hsa-miR-15a-5p  | 204066 |
| hsa-miR-15b-5p  | 204243 |
| hsa-miR-16-5p   | 205702 |
| hsa-miR-486-5p  | 204001 |
| hsa-miR-1       | 204344 |
| hsa-miR-206     | 206073 |
| hsa-miR-33a-5p  | 205690 |
| hsa-miR-33b-5p  | 205860 |
| hsa-miR-328-3p  | 204364 |
| hsa-miR-203a    | 205914 |
| hsa-miR-106a-5p | 204563 |
| hsa-miR-106b-5p | 205884 |
| hsa-miR-103a-3p | 204063 |
| hsa-miR-423-5p  | 205624 |
| hsa-miR-191-5p  | 204306 |
